# Supplementary material
Source: Elsevier journal article supplement (https://www.sciencedirect.com/science/article/pii/S1696780116300525)
Supplement: mmc1 [file S1696780116300525:mmc1.pdf]

## ENCUESTA

### PROYECTO "¡NO PUC ESPERAR!" - "¡NO PUEDO ESPERAR!"

Nº de tarjeta:

Fecha de entrega de la tarjeta:

Tipo de enfermedad intestinal:

- ☐ Colitis Ulcerosa  
☐ Enfermedad de Crohn  
☐ Colectomizados

☐ Otras

Tipo de tratamiento:

- ☐ Farmacológico ☐ Quirúrgico ☐ Mixto

Estado de la enfermedad después de la entrega de la tarjeta:

- ☐ Brote ☐ Remisión ☐ Nada

### PERCEPCION DEL USUARIO:

¿Qué opina usted del proyecto?

- ☐ Excelente ☐ Bueno ☐ Regular ☐ Malo

La tarjeta le parece:

- ☐ 5 ☐ 4 ☐ 3 ☐ 2 ☐ 1

**Muy útil----- Poco útil**

¿Según usted, hay suficientes establecimientos/equipamientos adheridos en el proyecto?

- ☐ SI ☐ NO

¿Estos establecimientos/equipamientos están bien señalizados?

- ☐ SI ☐ NO

Debido a su condición, le cuesta salir a la calle?

- ☐ Si ☐ NO

La tarjeta le permite salir a la calle con:

- ☐ Más frecuencia ☐ Igual que antes

Tener la tarjeta, hace que usted se sienta:

☐ Reconocido por su enfermedad ☐ Igual ☐ Discriminado por su enfermedad

¿Ha mejorado su percepción personal respecto al hecho de padecer la enfermedad?

☐ Si ☐ NO

#### PERCEPCION DEL PUBLICO:

¿El personal de los establecimientos tienen conocimiento de la existencia de la tarjeta?

☐ SI ☐ Un Poco ☐ NO

¿Cómo es el trato del personal de los establecimientos?

☐ 5 ☐ 4 ☐ 3 ☐ 2 ☐ 1

Muy comprehensivo>>>>>>Poco

#### EVALUACION DE LA EFICIENCIA DE LA TARJETA:

¿Ha utilizado la tarjeta?

☐ SI ☒ NO

¿Con qué frecuencia utiliza la tarjeta en el mes?

☐ 1 a 5 veces ☐ 5 a 15 veces ☐ >15 veces ☐ ninguna

El acceso a los servicio con la tarjeta es:

☐ Más rapido ☐ Igual ☐ Más lento

¿Podría usted decir que ha mejorado su calidad de vida?

☐ SI ☒ NO
